# Supplementary material
Source: Springer Nature journal article supplement (https://www.springermedizin.de/resource/supplementary/12913_2006_349_MOESM3_ESM.pdf/9535148)

**Baseline**

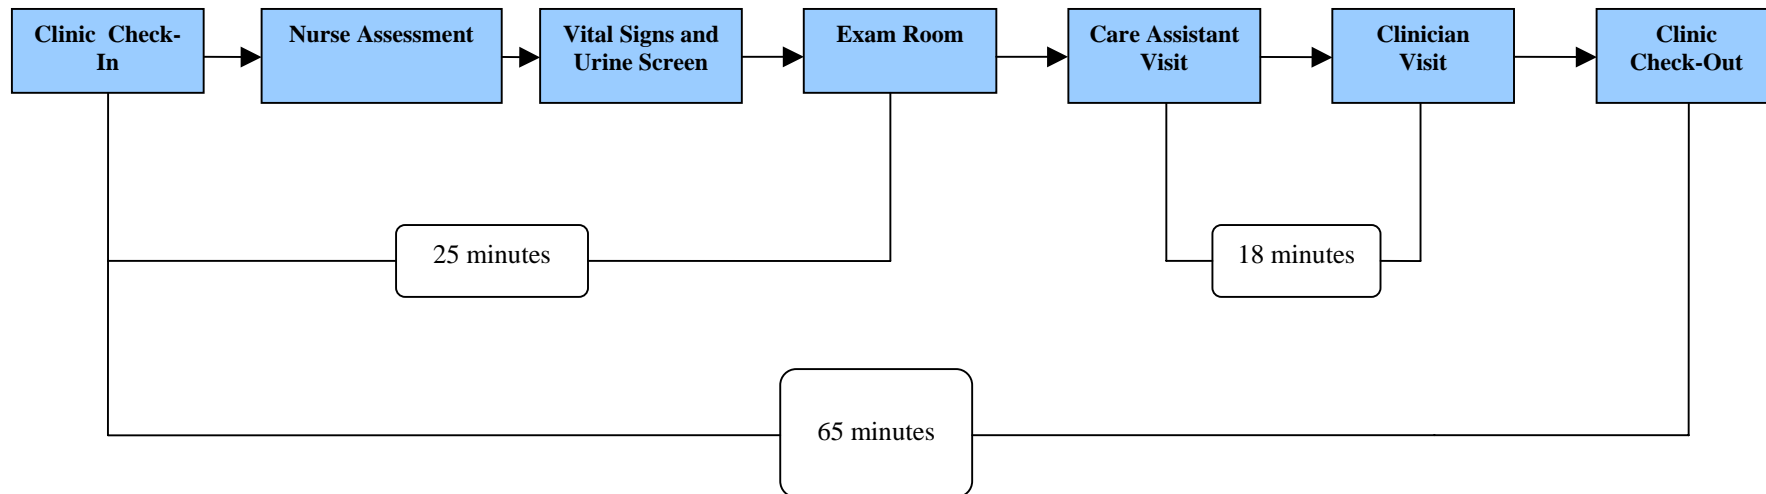

**After Intervention**

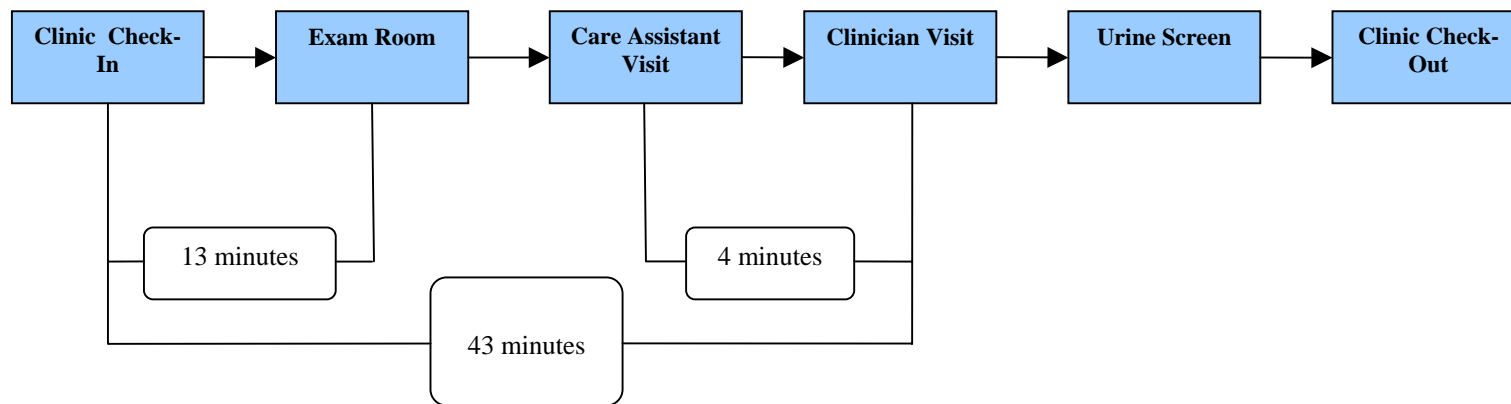

**Net Difference of 22 minutes**

Supplement: MOESM3 [file 9535148]
